# Supplementary figures and images for: Improving climate model accuracy by exploring parameter space with an O(10 5 ) member ensemble and emulator
Source: Copernicus journal article supplement (doi:10.5194/gmd-2018-198), 2018-10-23

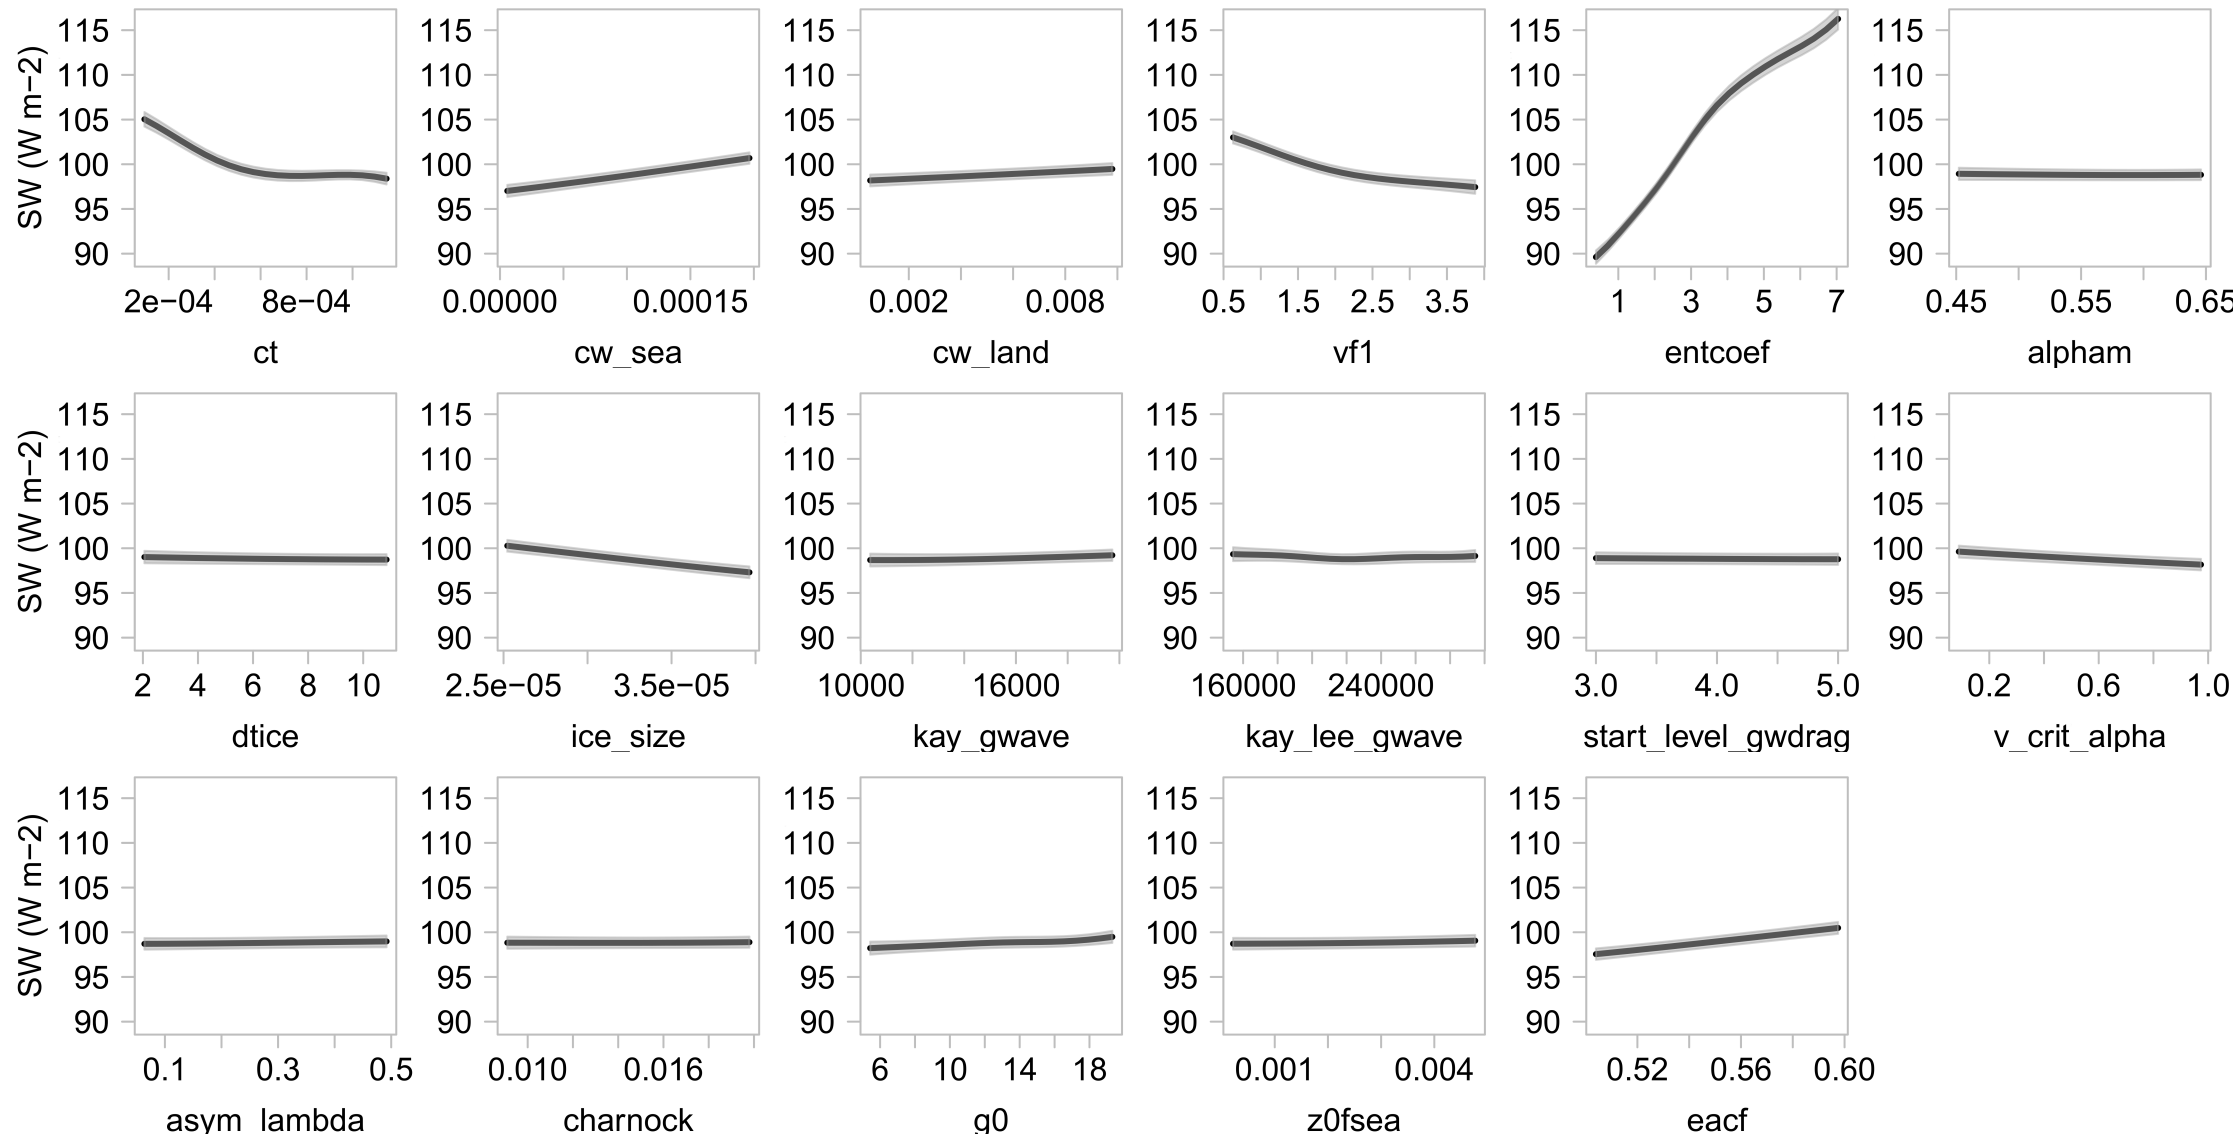

Supplement: Supplementary file 1 [file Figure_S10.pdf › Supplementary/Figure_S10.pdf]

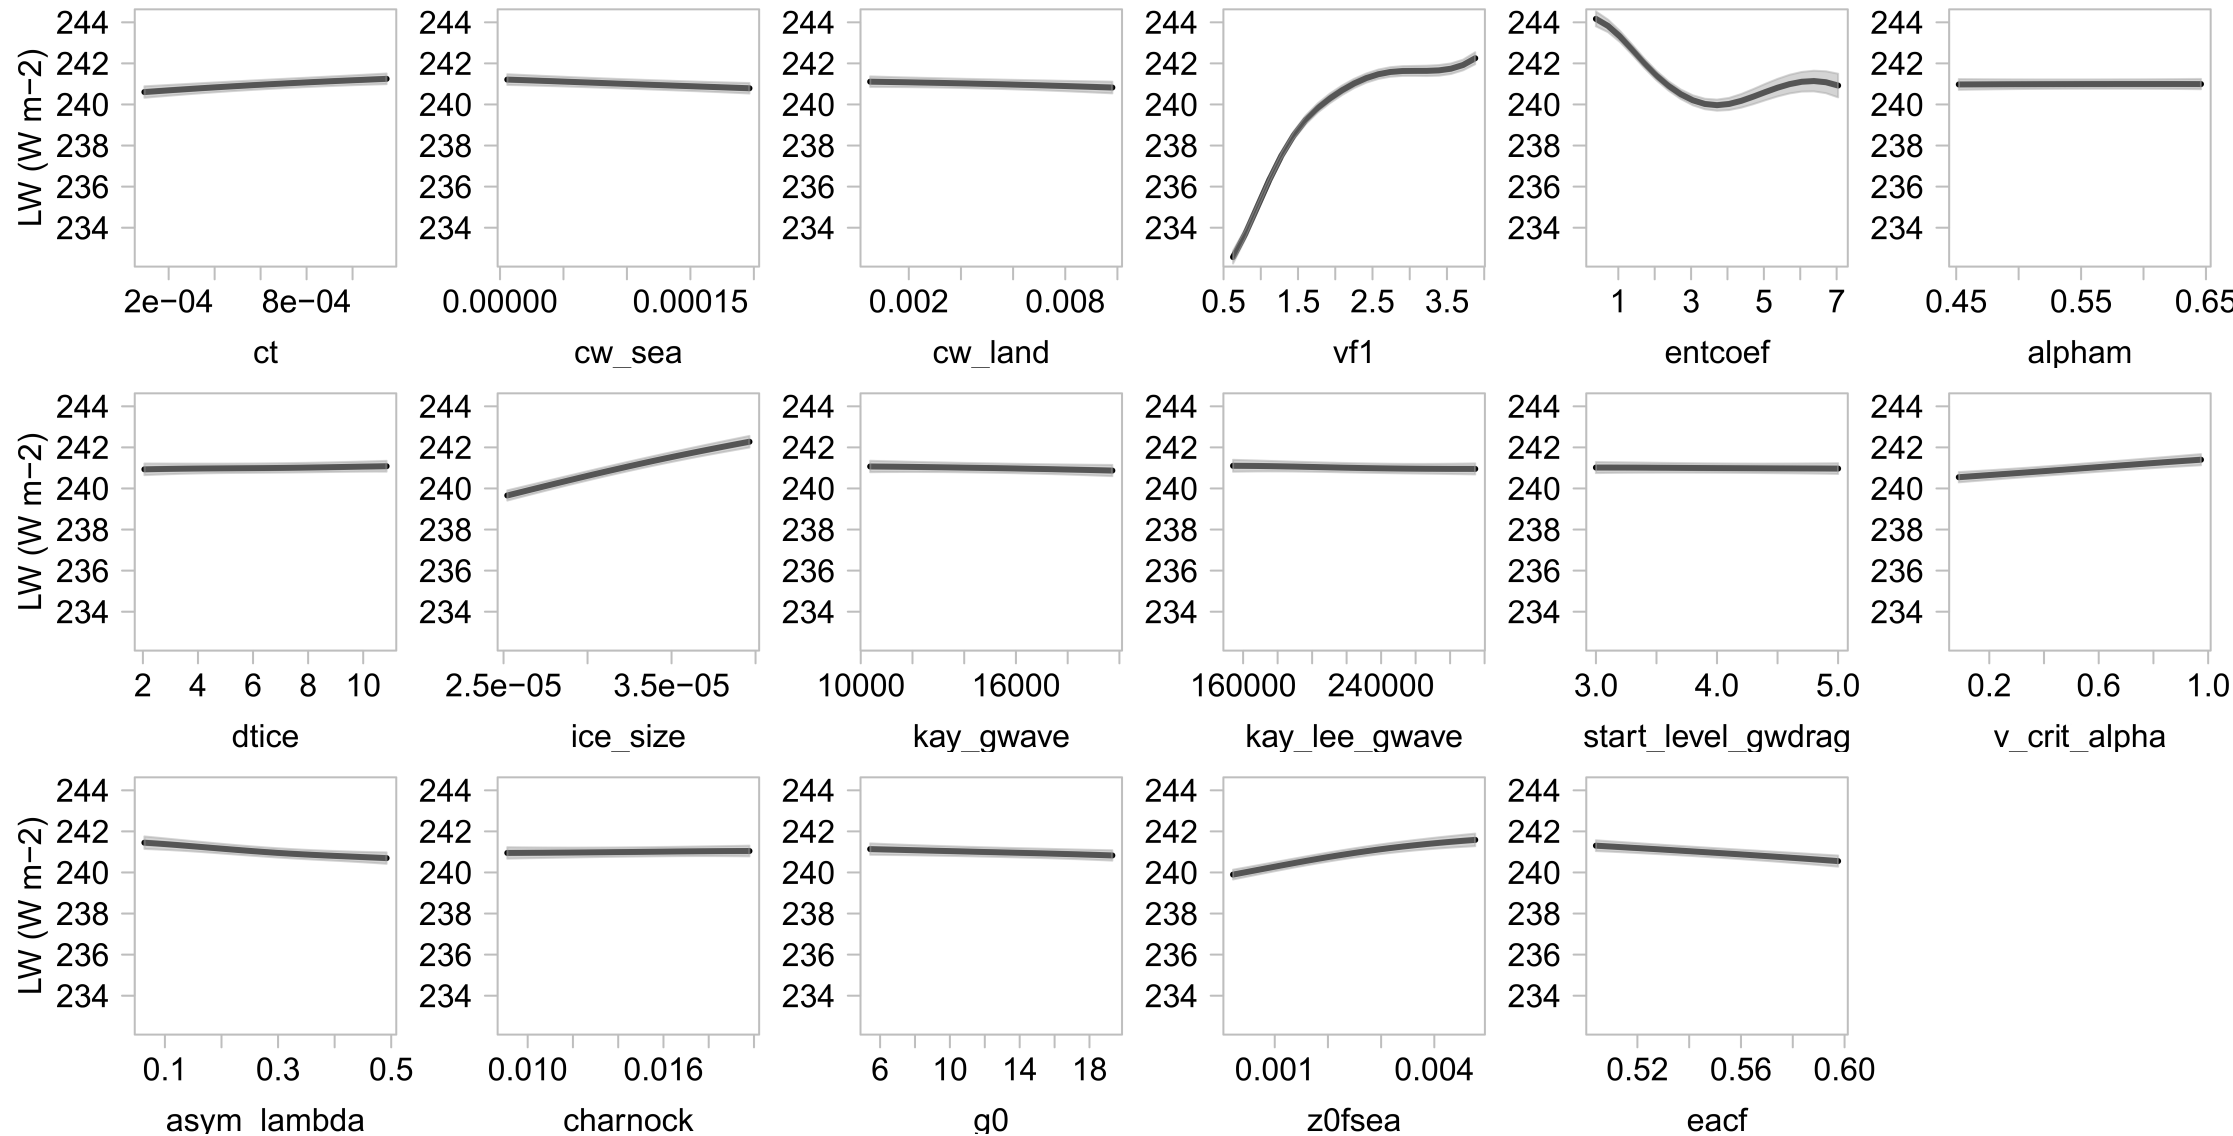

Supplement: Supplementary file 2 [file Figure_S11.pdf › Supplementary/Figure_S11.pdf]

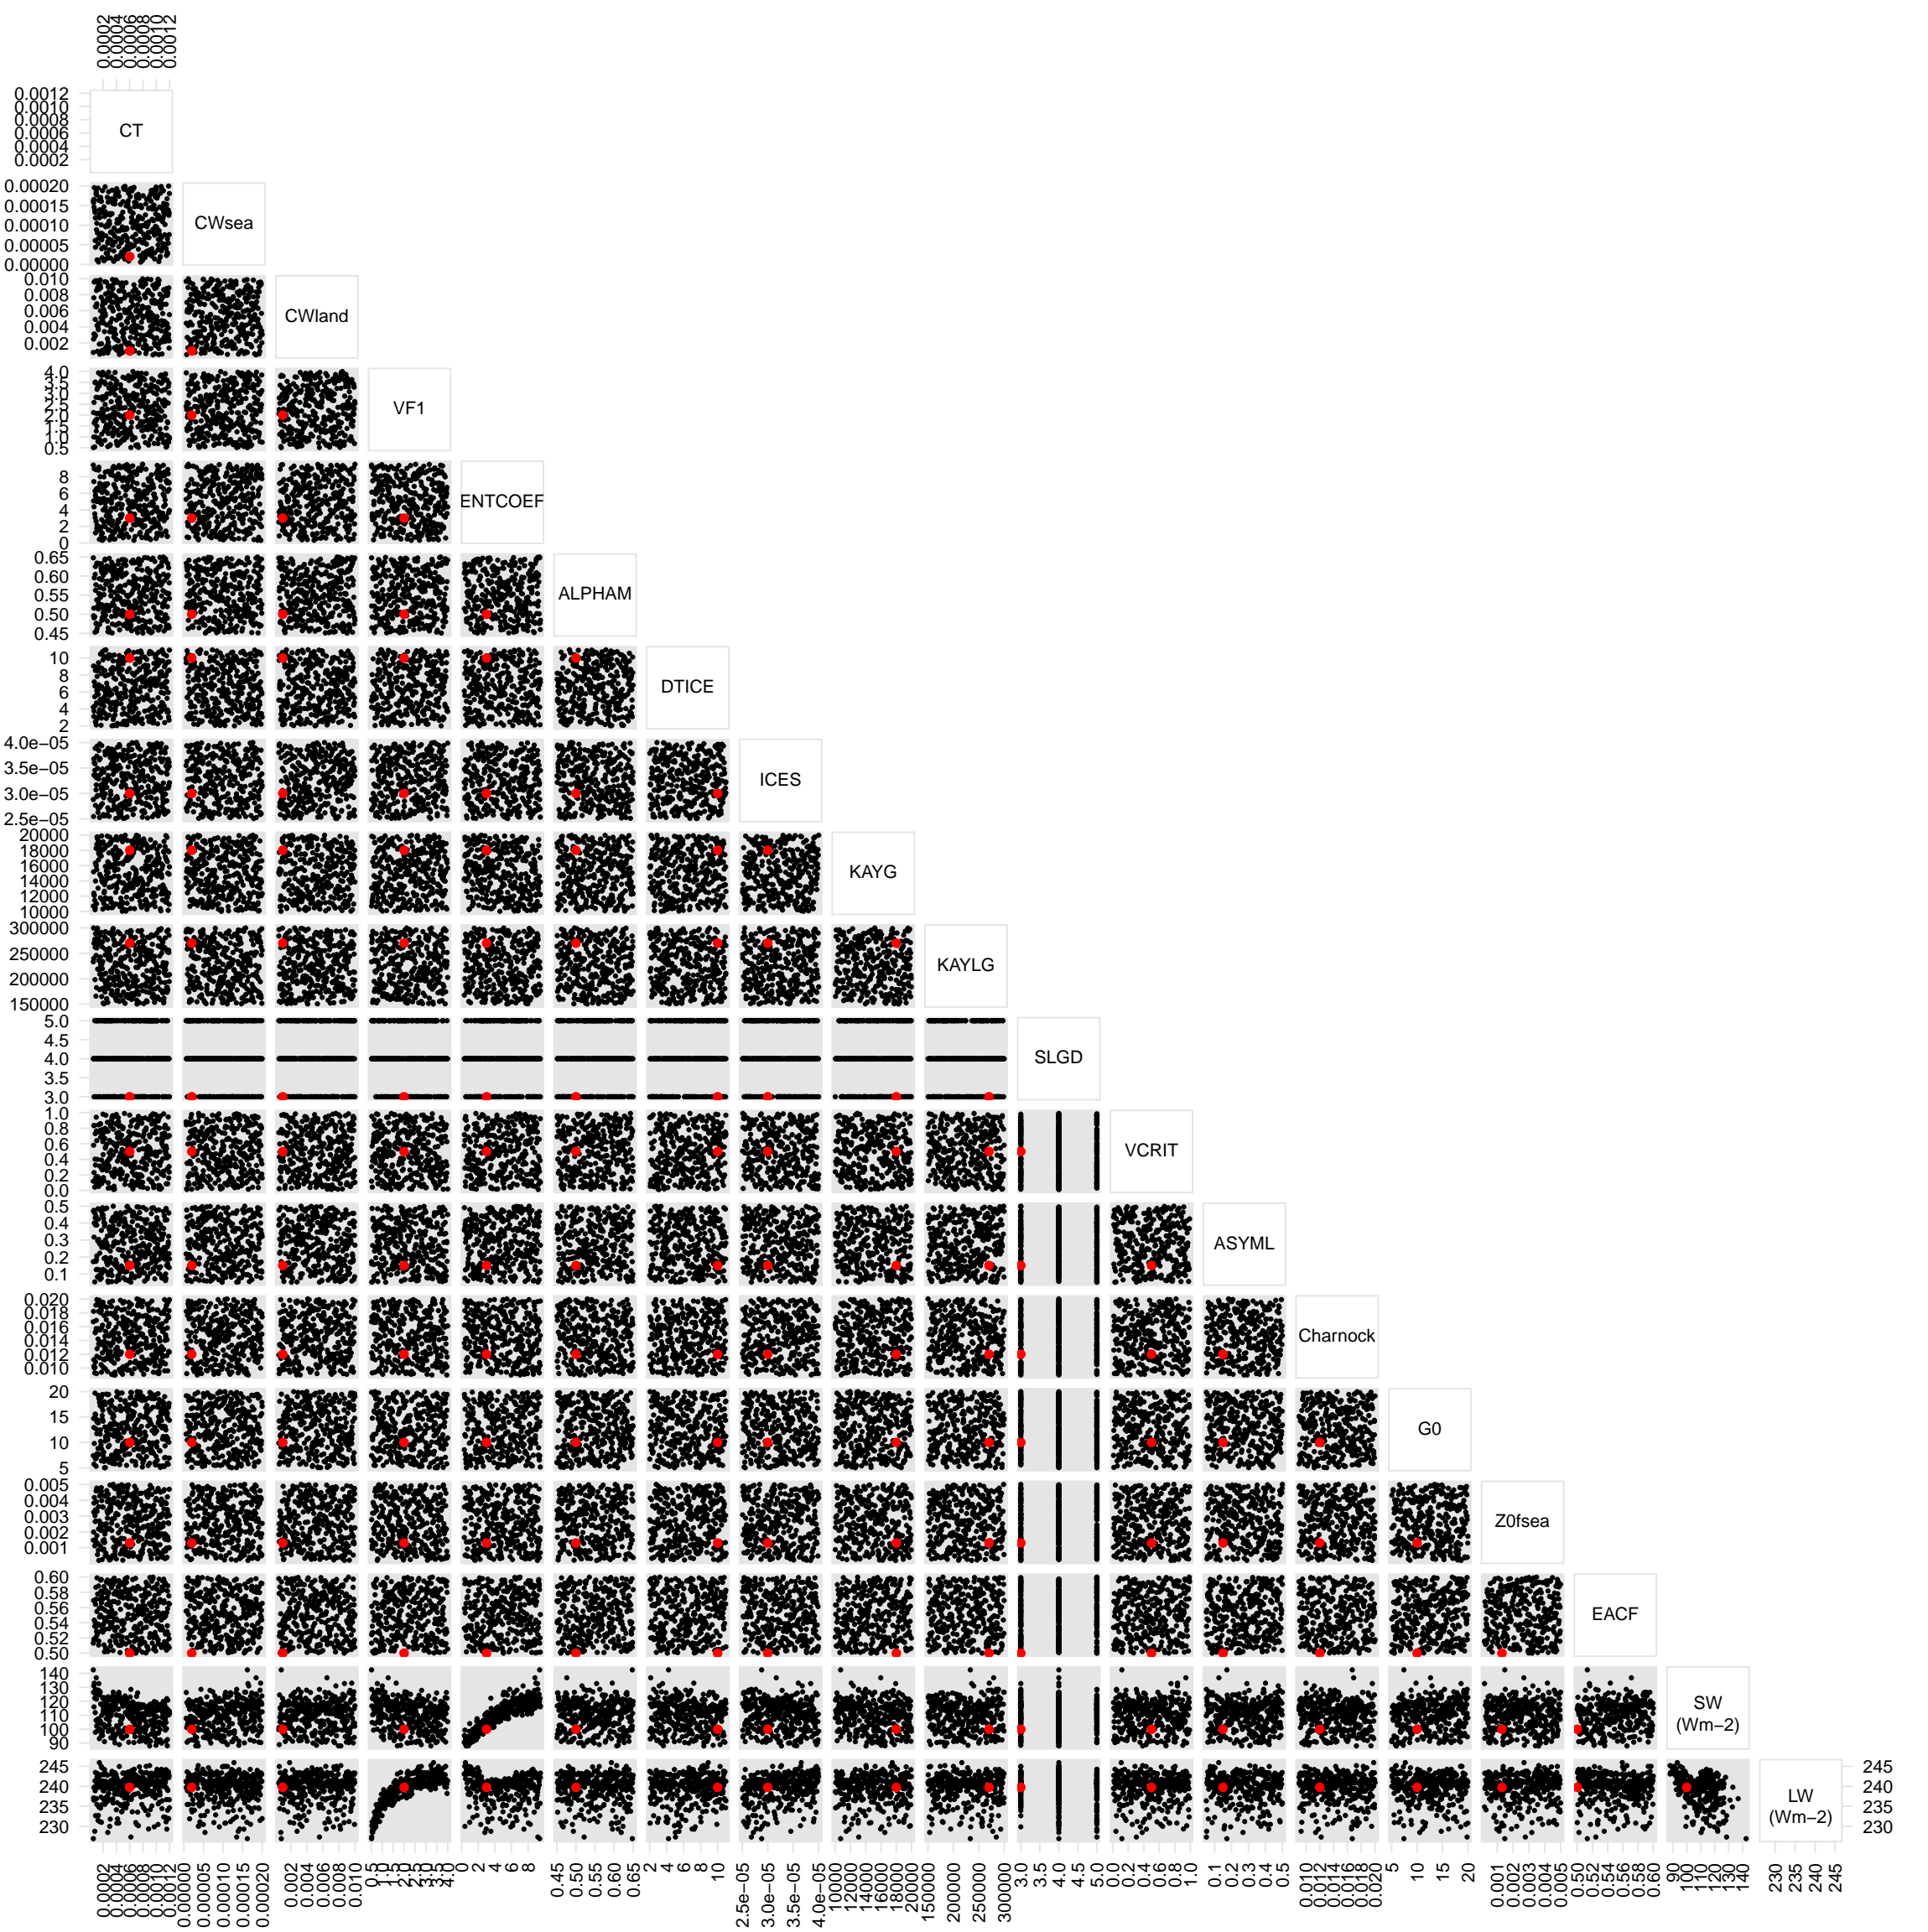

Supplement: Supplementary file 3 [file Figure_S2.pdf › Supplementary/Figure_S2.pdf]

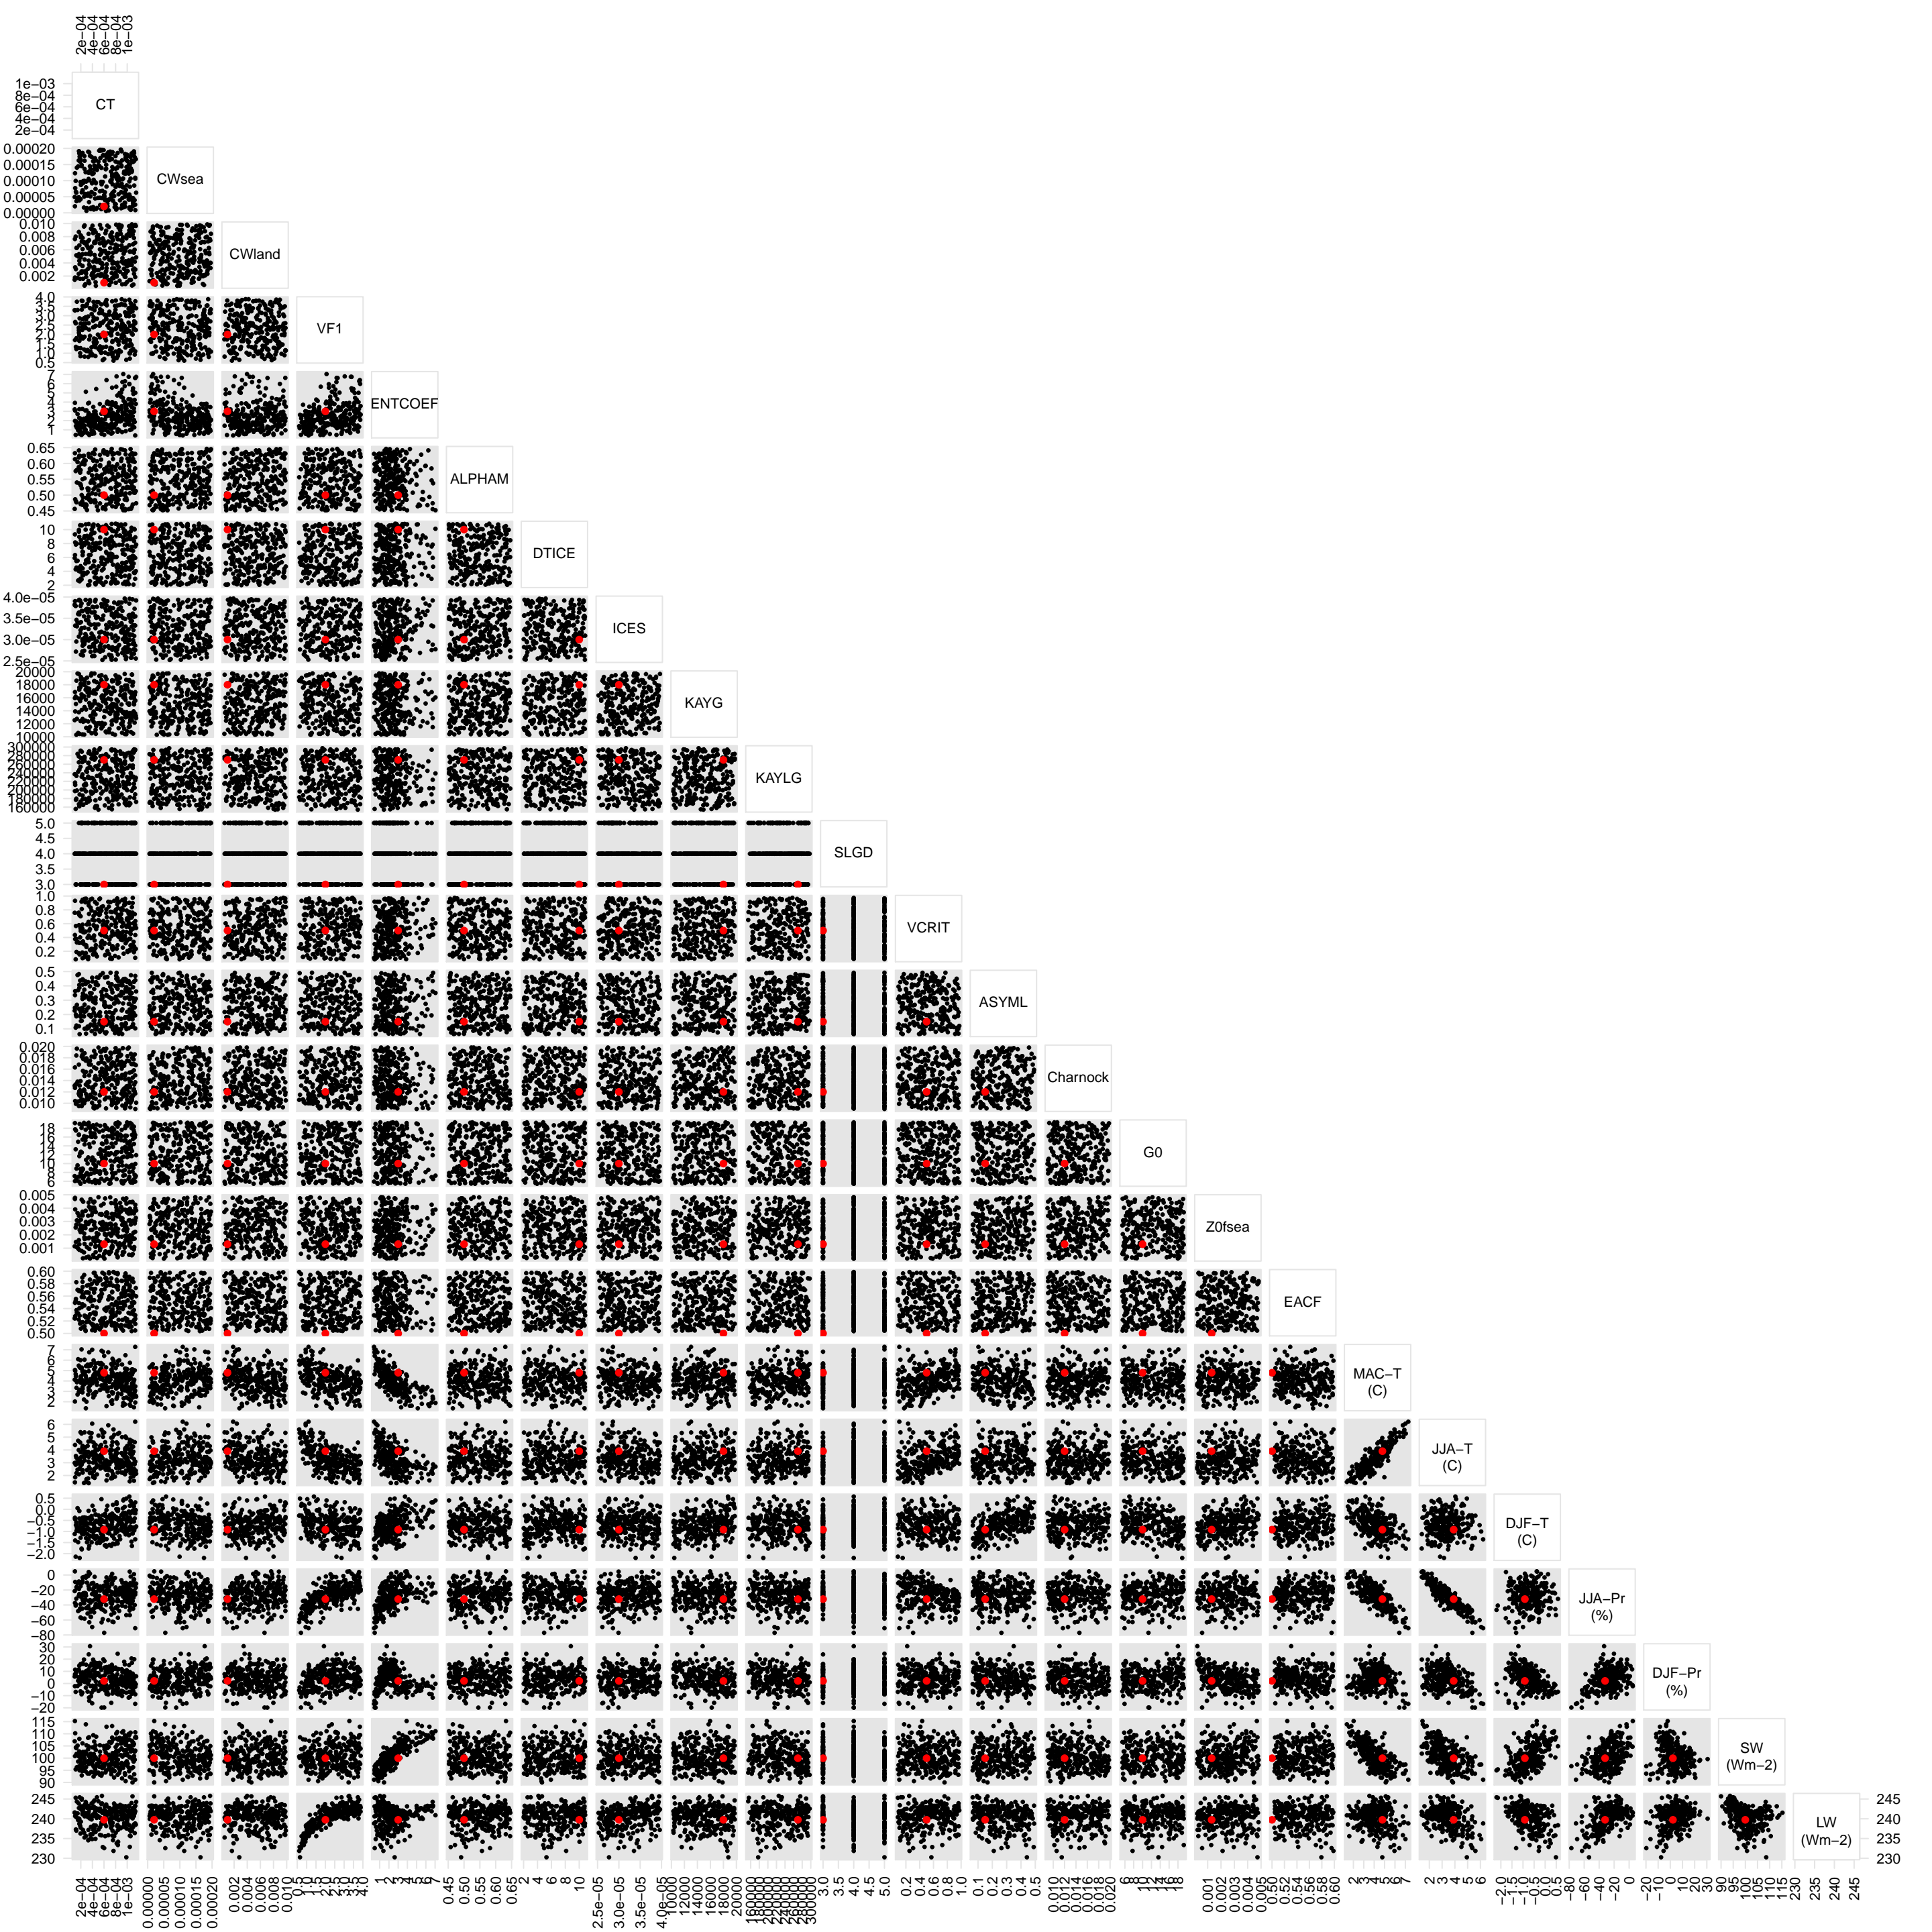

Supplement: Supplementary file 4 [file Figure_S3.pdf › Supplementary/Figure_S3.pdf]

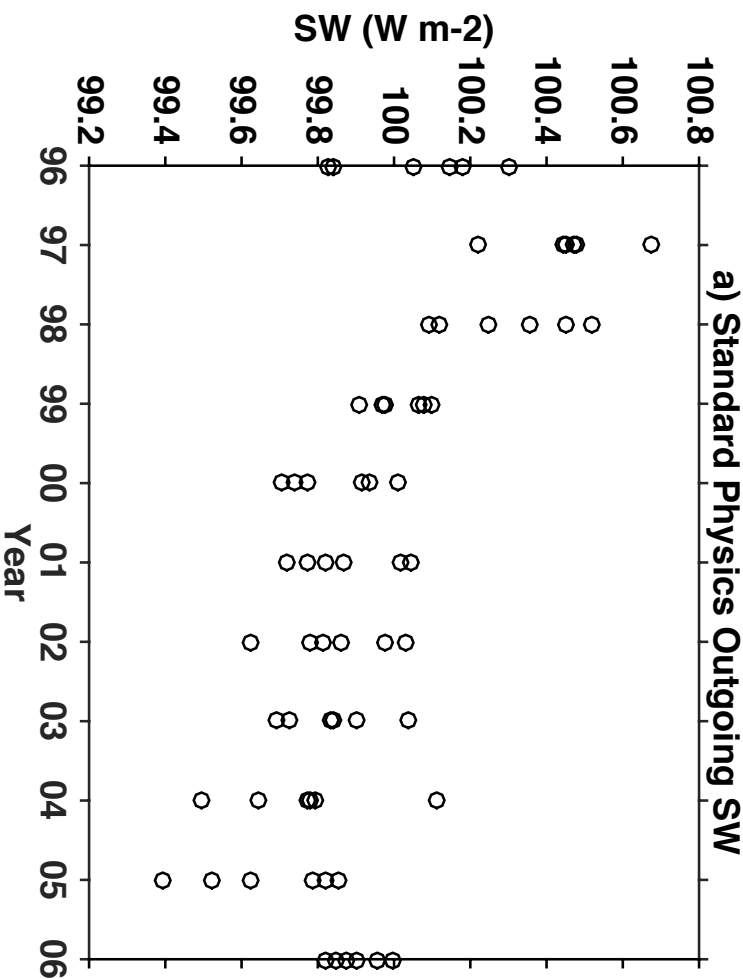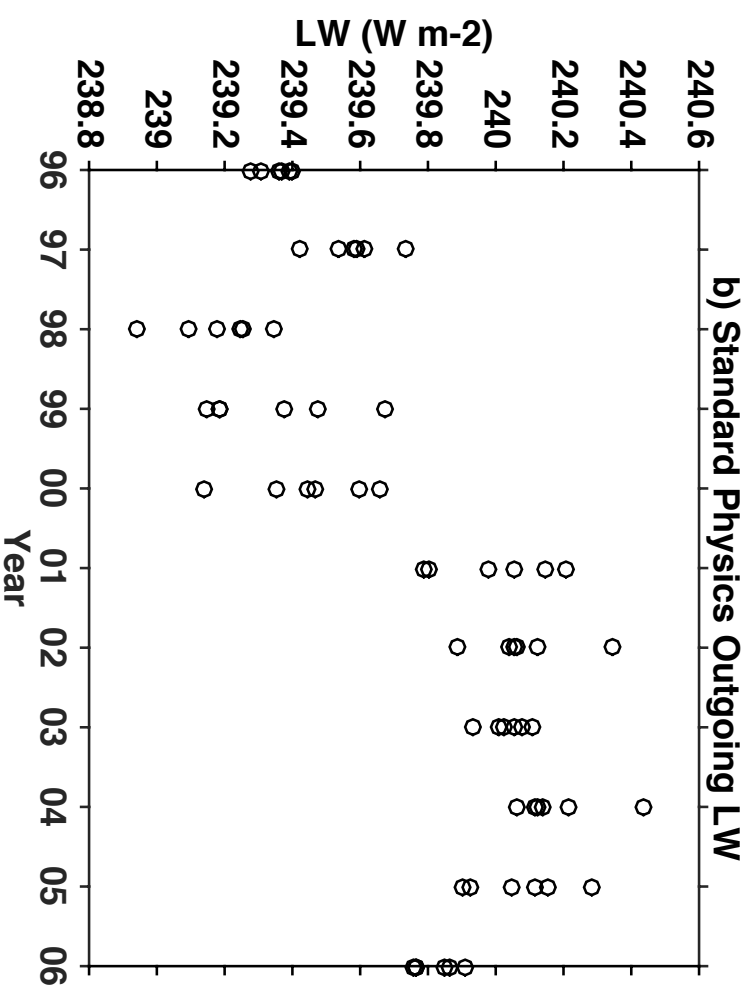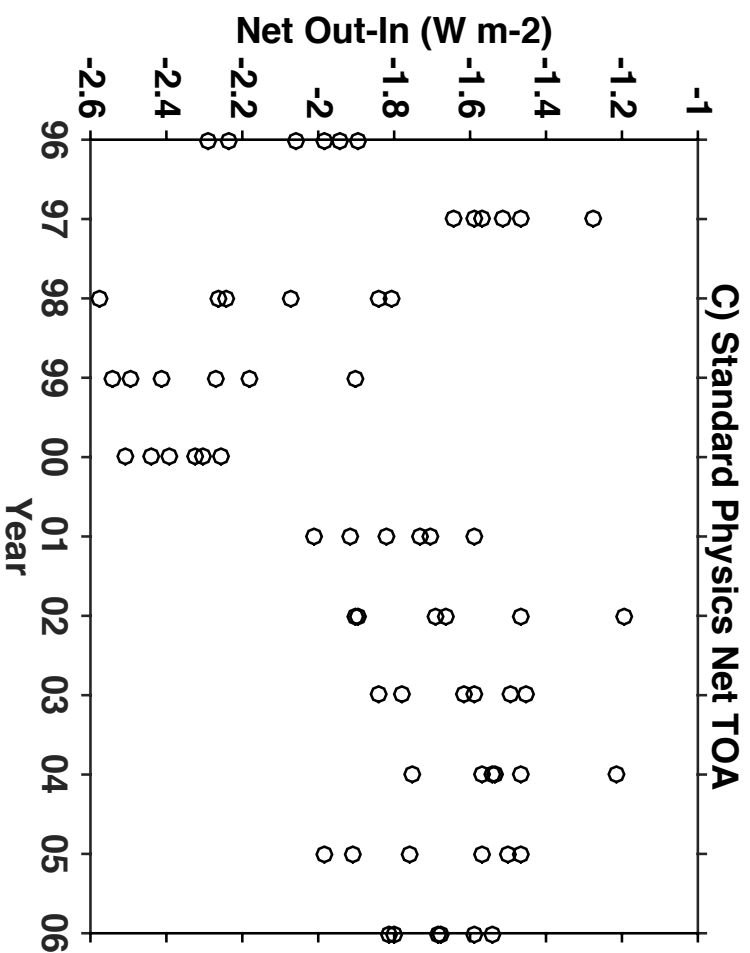

Supplement: Supplementary file 5 [file Figure_S5.pdf › Supplementary/Figure_S5.pdf]

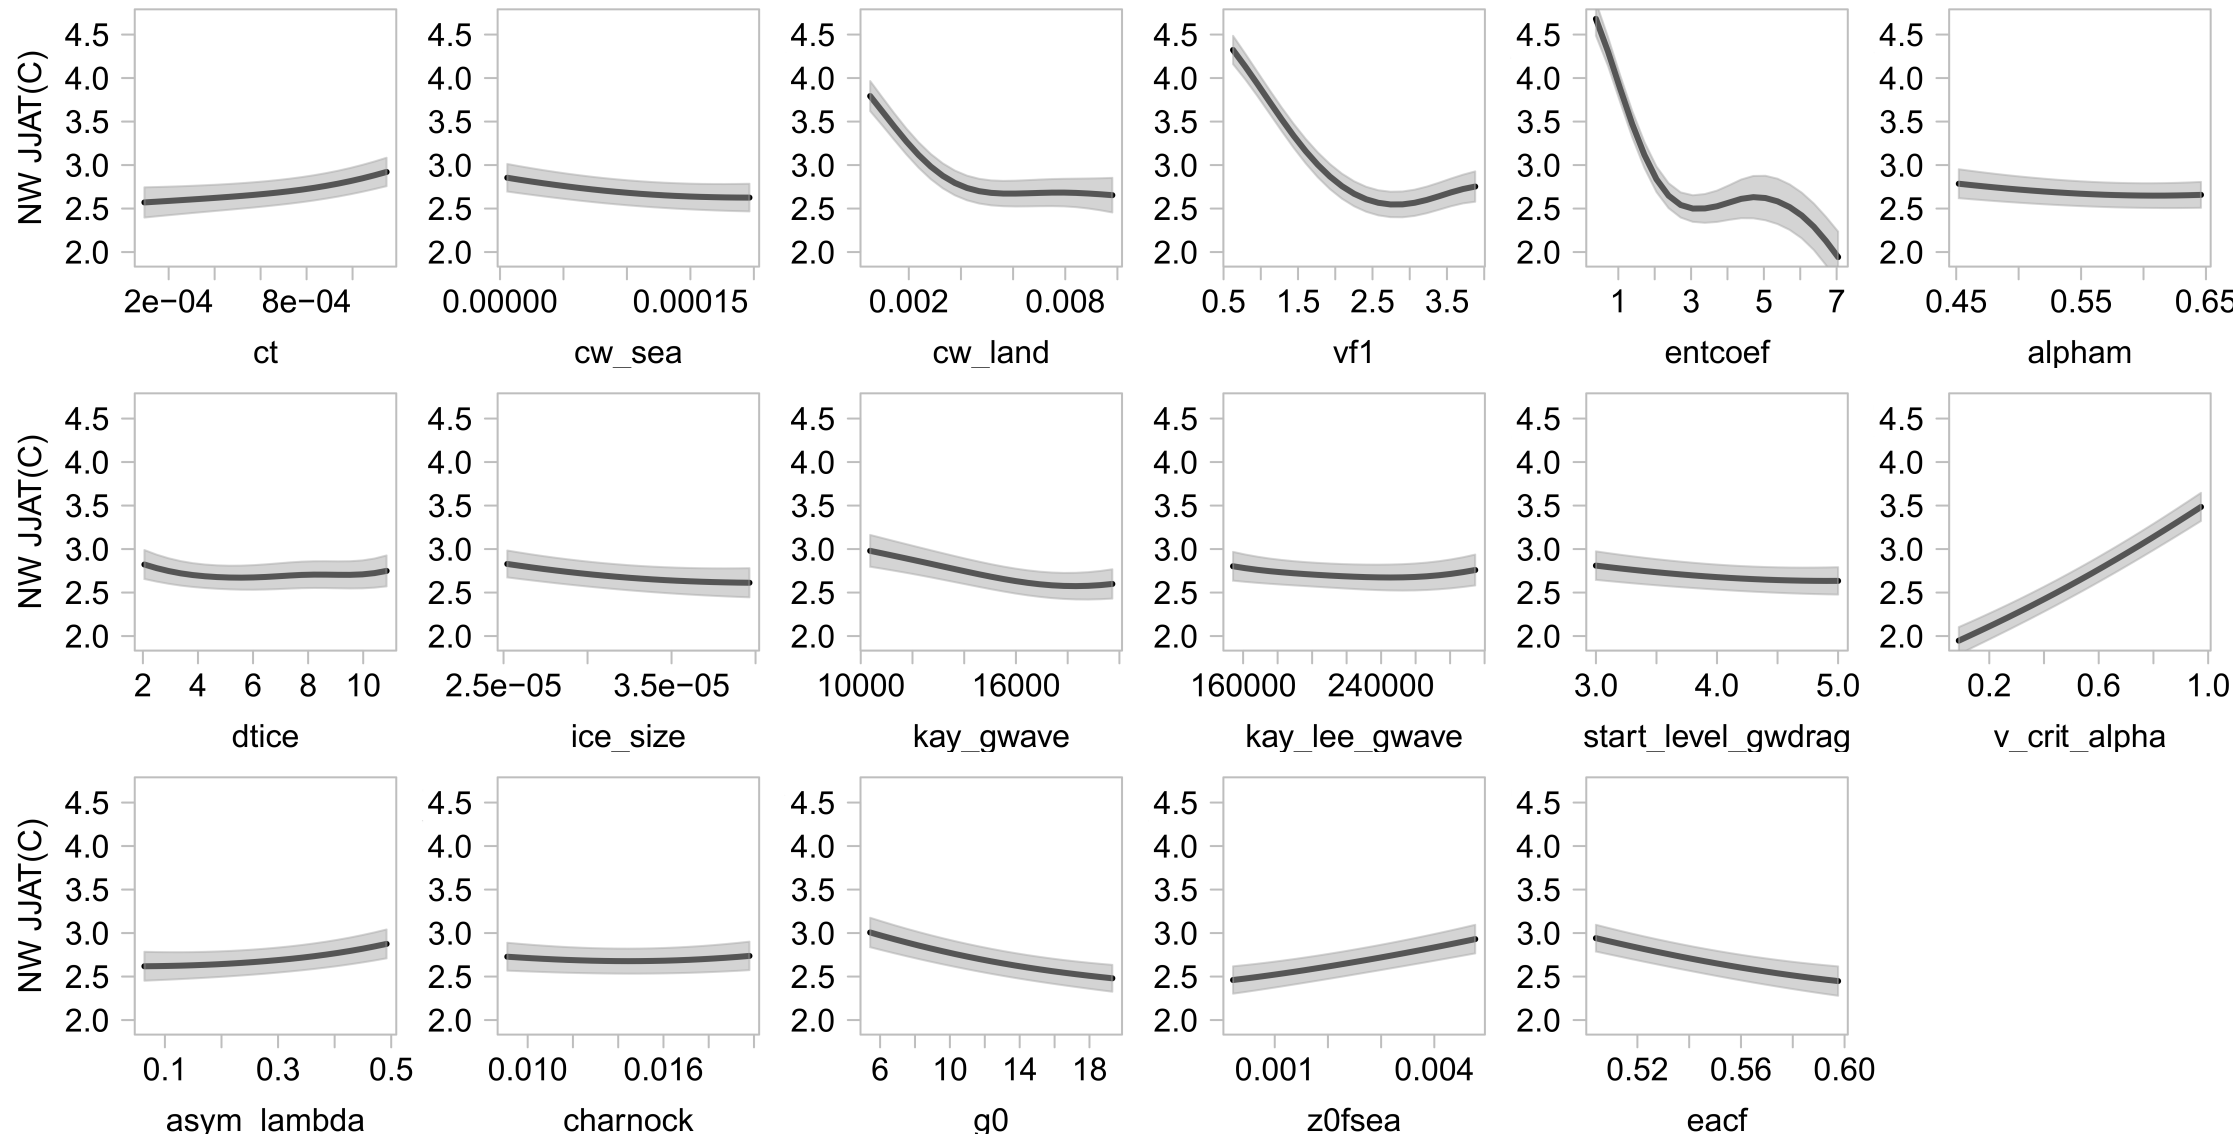

Supplement: Supplementary file 6 [file Figure_S6.pdf › Supplementary/Figure_S6.pdf]

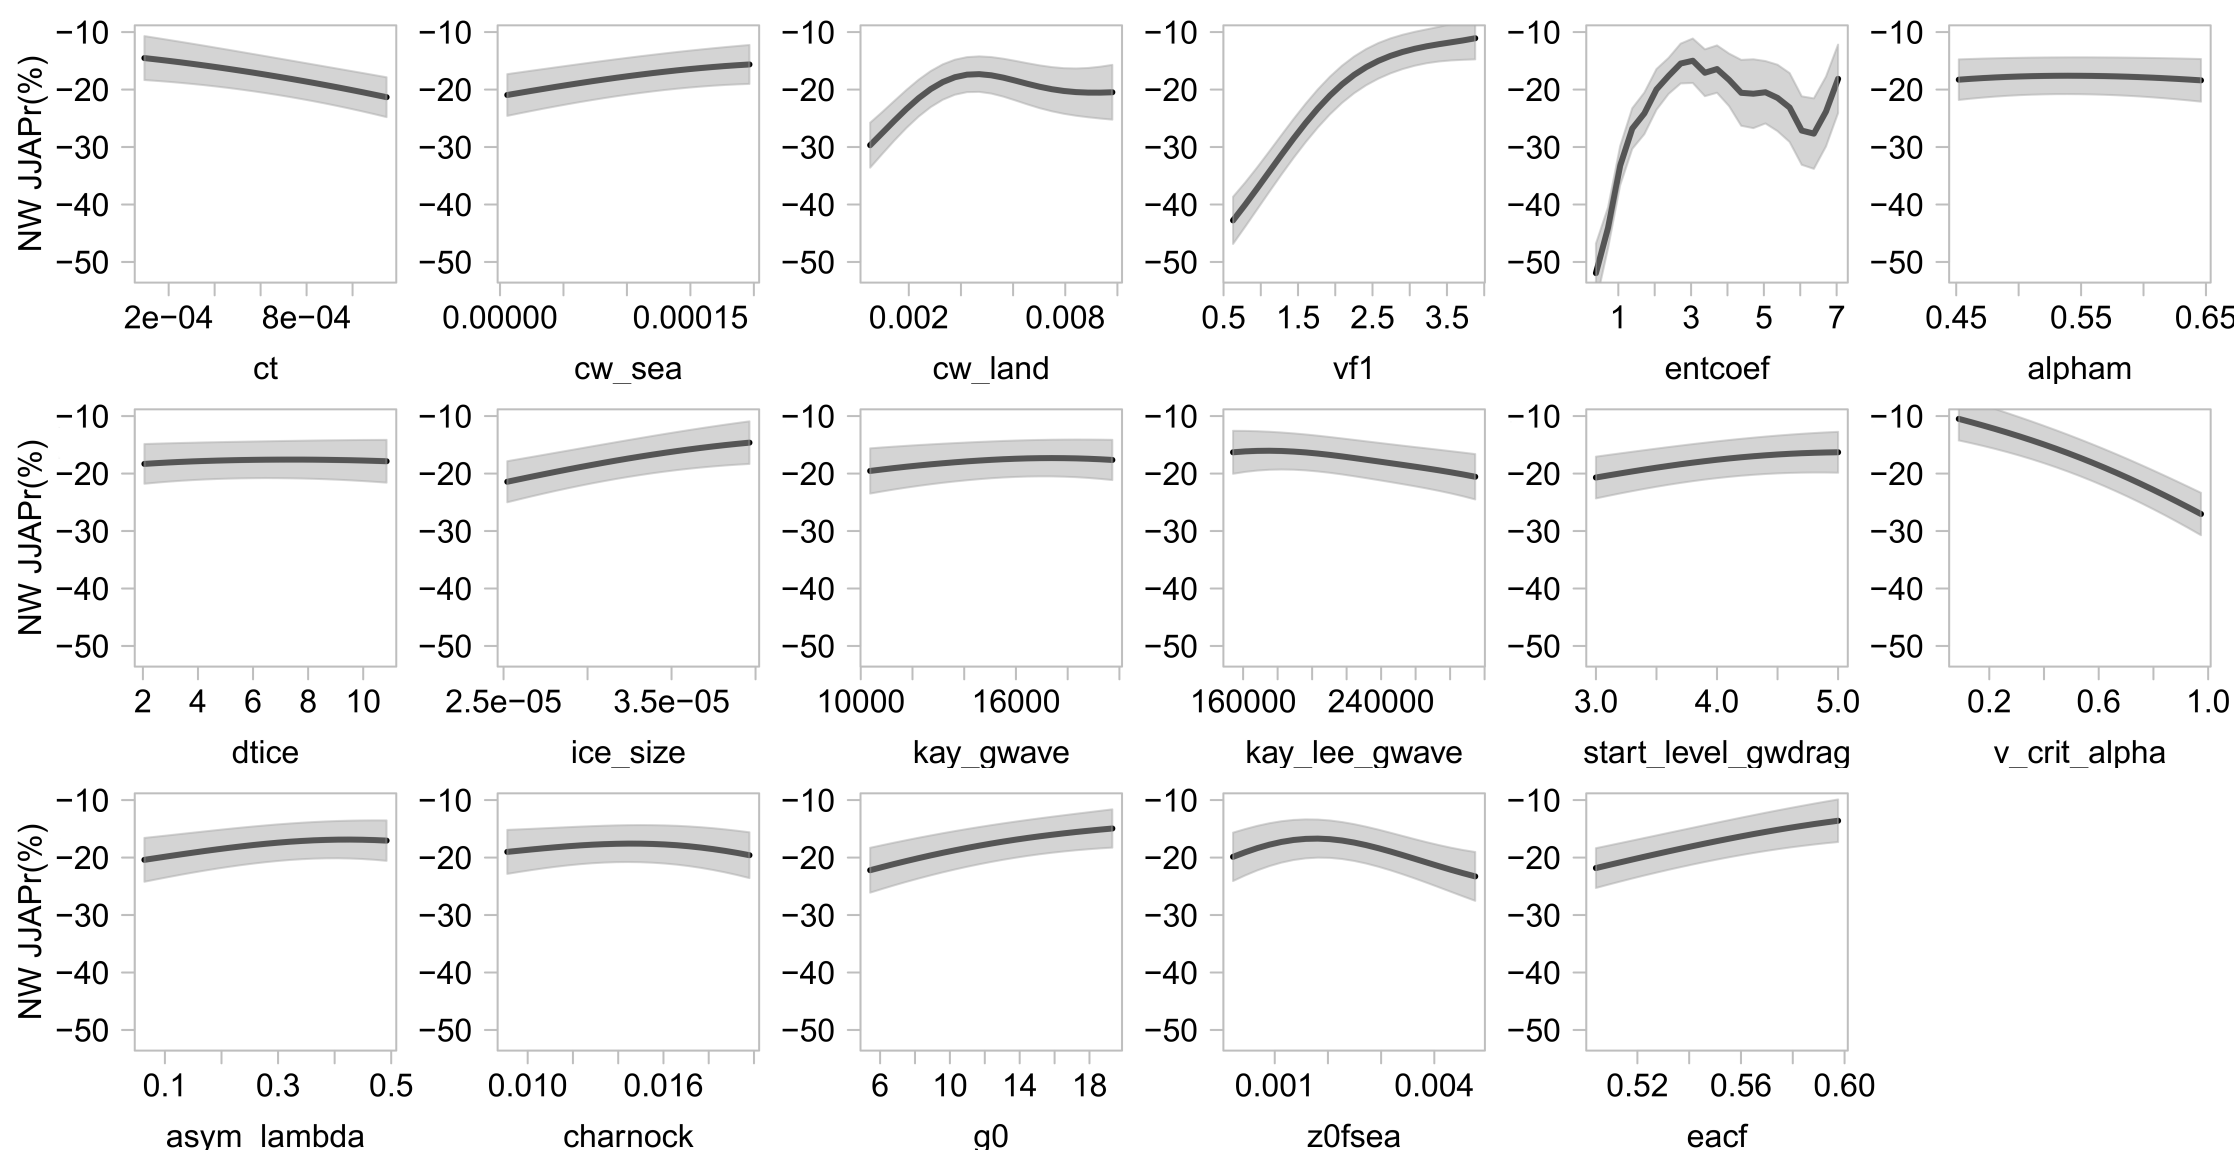

Supplement: Supplementary file 7 [file Figure_S7.pdf › Supplementary/Figure_S7.pdf]

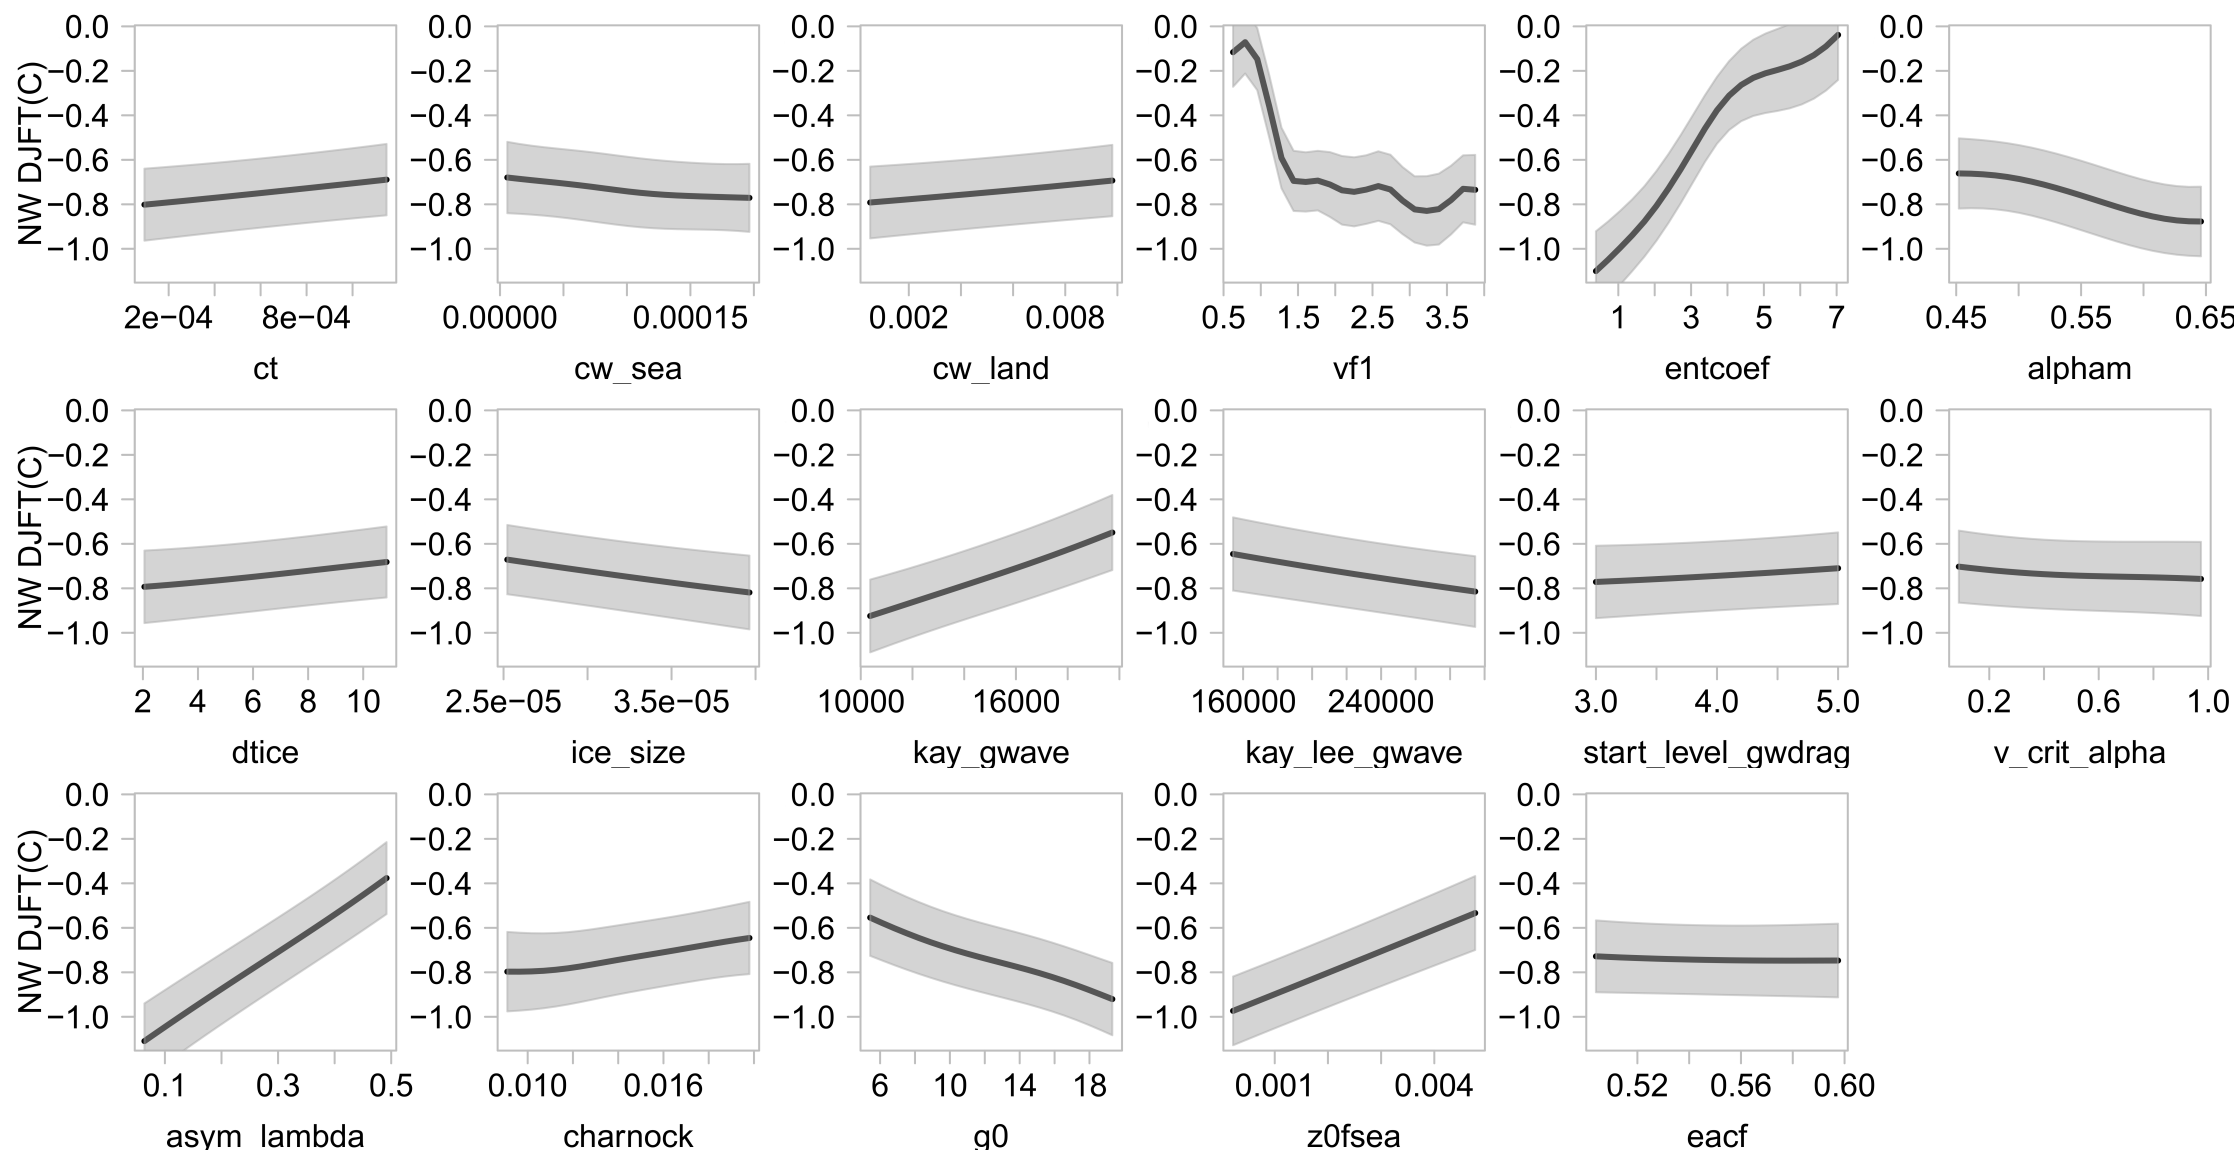

Supplement: Supplementary file 8 [file Figure_S8.pdf › Supplementary/Figure_S8.pdf]

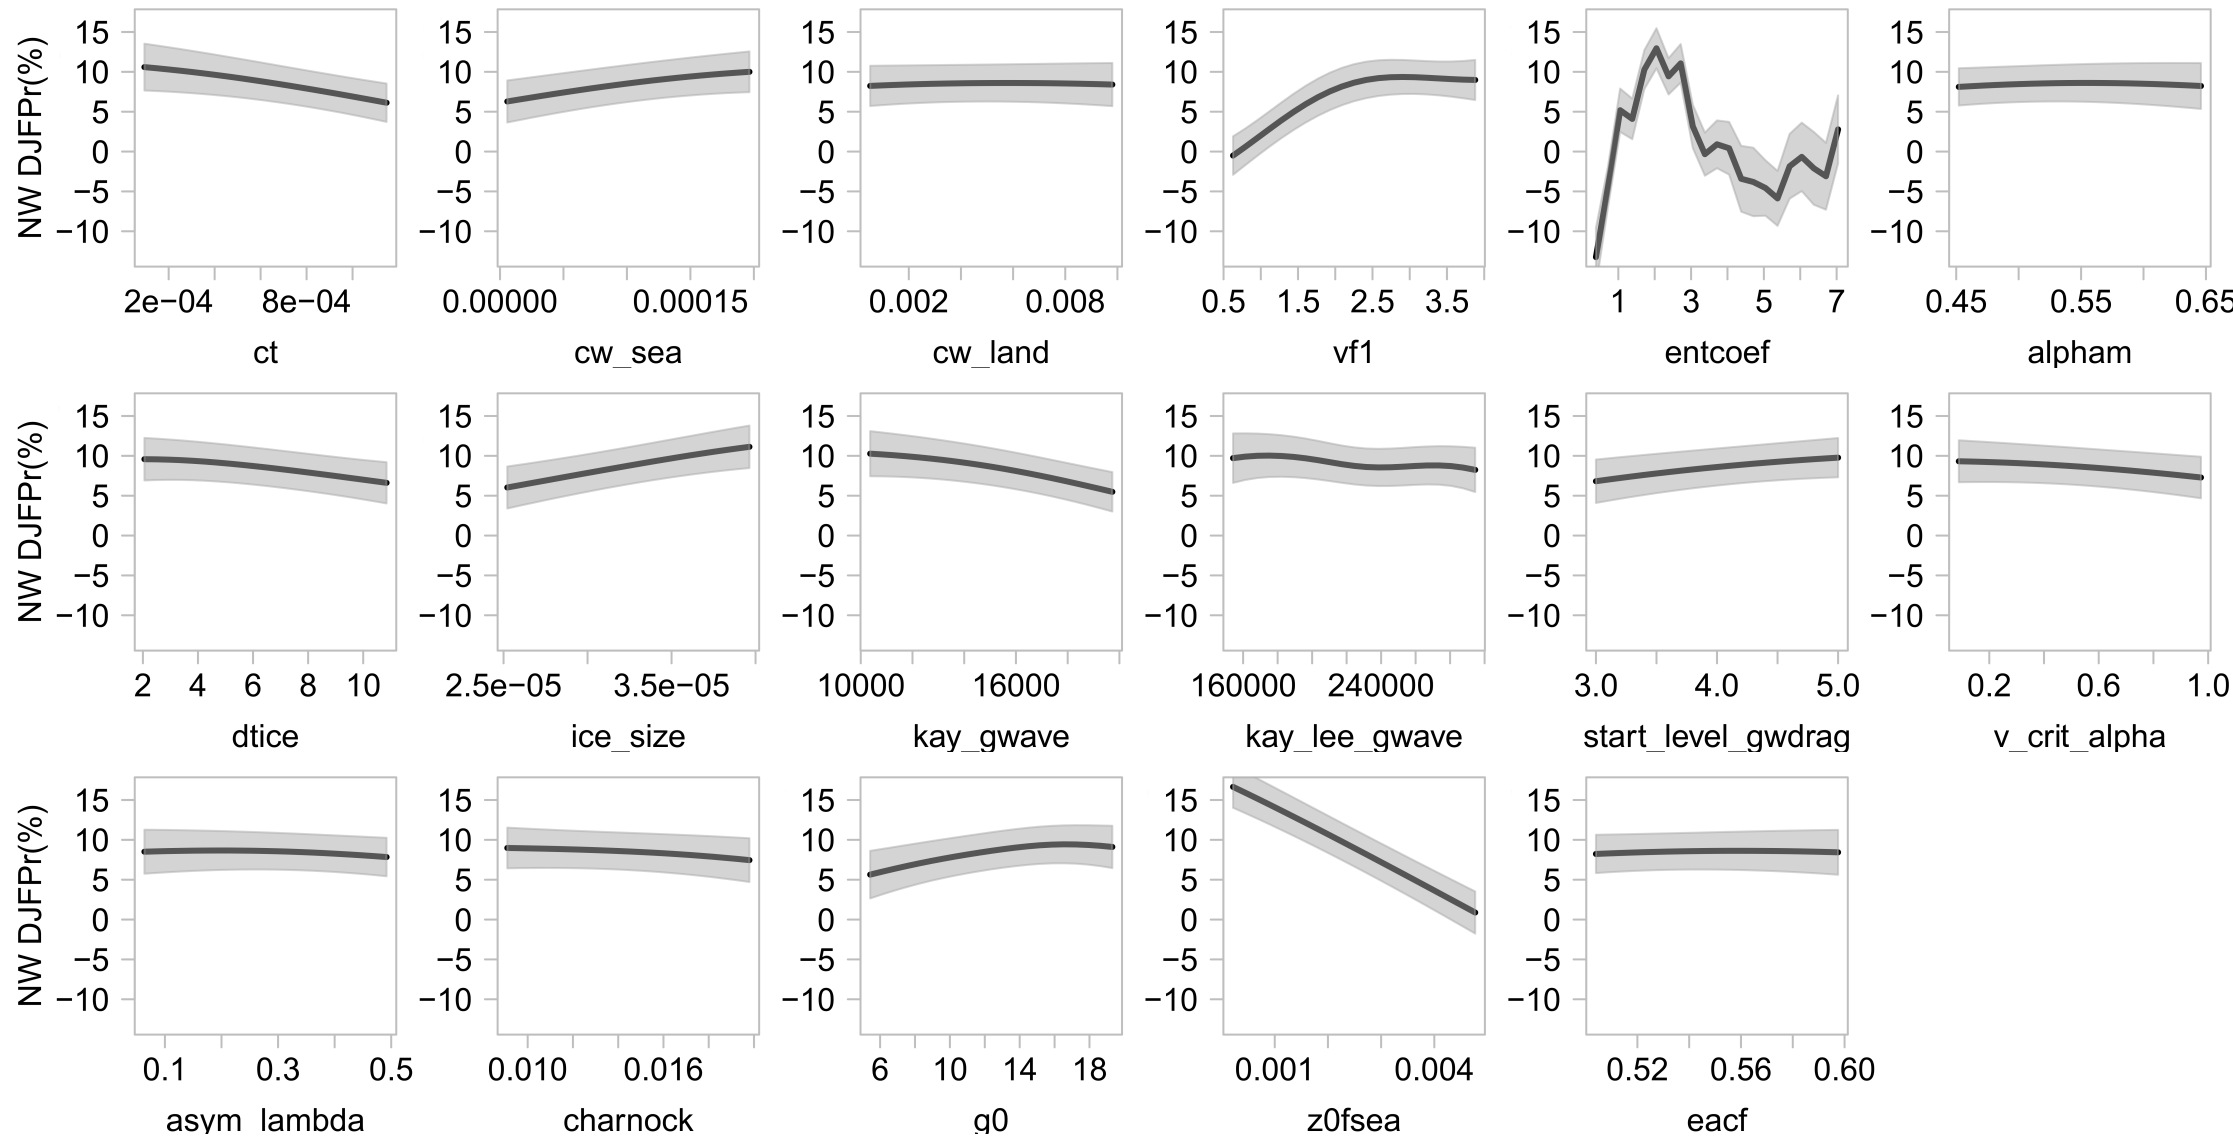

Supplement: Supplementary file 9 [file Figure_S9.pdf › Supplementary/Figure_S9.pdf]
